# Supplementary material for: Borrelia burgdorferi surface protein Lmp1 facilitates pathogen dissemination through ticks as studied by an artificial membrane feeding system
Source: PubMed Central journal article supplement (PMC5790009; doi:10.1038/s41598-018-20208-4), 2018-01-30
Supplement: 41598_2018_20208_MOESM1_ESM.pdf [file 41598_2018_20208_MOESM1_ESM.pdf]

**Supplementary Information for the manuscript entitled**

***Borrelia burgdorferi* surface protein Lmp1 facilitates pathogen dissemination through ticks as studied by an artificial membrane feeding system**

Juraj Koci, Quentin Bernard, Xiuli Yang and Utpal Pal

The supplementary information contains:  
One Supplementary Figure and Legends to Supplementary Figure

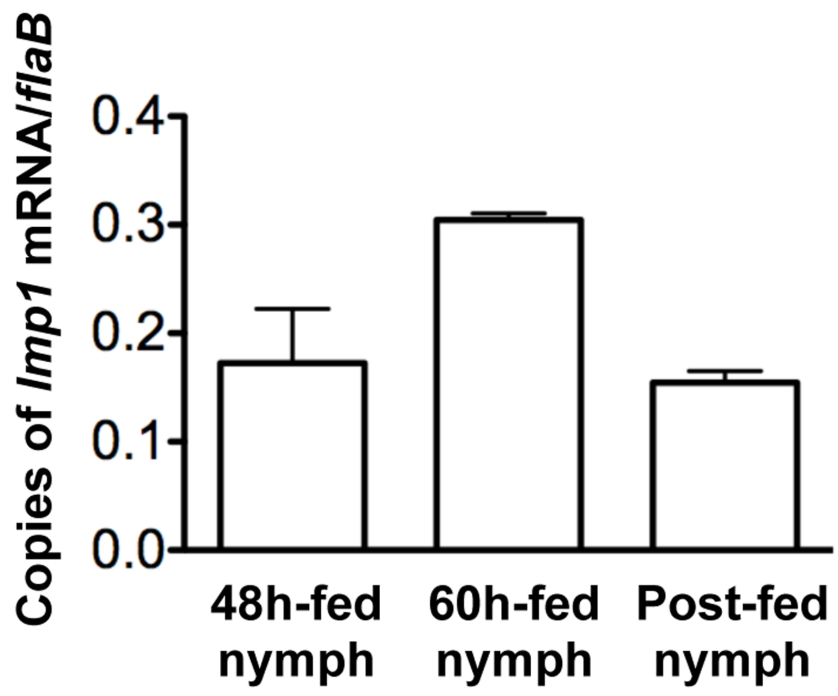

## Legends to Supplementary Figures

**Fig. S1. *Lmp1* expression in feeding nymphal ticks.** The relative expression of *lmp1* is presented as copies of *lmp1* transcripts per 1000 copies of *flaB* transcripts, measured using qRT-PCR in individual ticks collected at multiple time points during feeding on mice 14 days after infection with wild-type *B. burgdorferi*. Bars represent the mean  $\pm$  SEM of at least two experimental replicates.
